# Supplementary material for: Ir-catalyzed asymmetric hydrogenation of β-keto esters with chiral ferrocenyl P,N,N-ligands
Source: Royal Society of Chemistry journal article supplement (doi:10.1039/c7ra00472a), 2017-01-01

## **Ir-catalyzed asymmetric hydrogenation of $\beta$ -keto esters with chiral ferrocenyl P,N,N-ligands**

Xiu-Shuai Chen, Chuan-Jin Hou,\* Chao Qin, Hongzhu Liu, Yan-Jun Liu, De-Zhi Huang and Xiang-Ping Hu\*

*School of Light Industry and Chemical Engineering, Dalian Polytechnic University, Dalian 116034, China. E-mail: houcj@dpu.edu.cn*

*Dalian Institute of Chemical Physics, Chinese Academy of Sciences, Dalian 116023, China. E-mail: xiangping@dicp.ac.cn*

### (S)-methyl 3-hydroxy-3-phenylpropanoate 3a

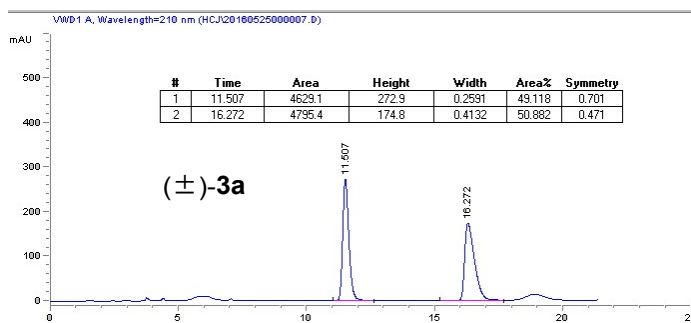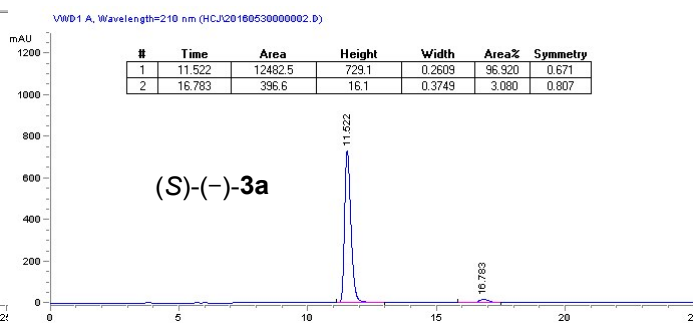

### (S)-methyl 3-(2-chlorophenyl)-3-hydroxypropanoate 3b

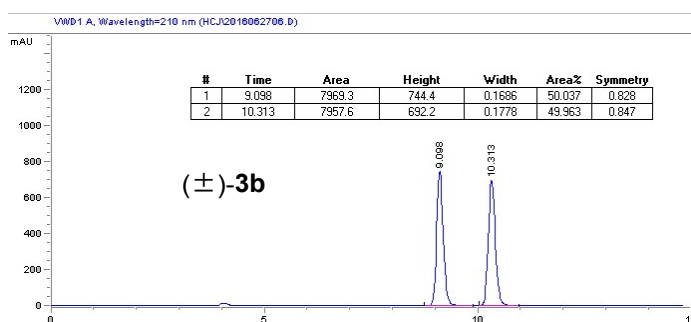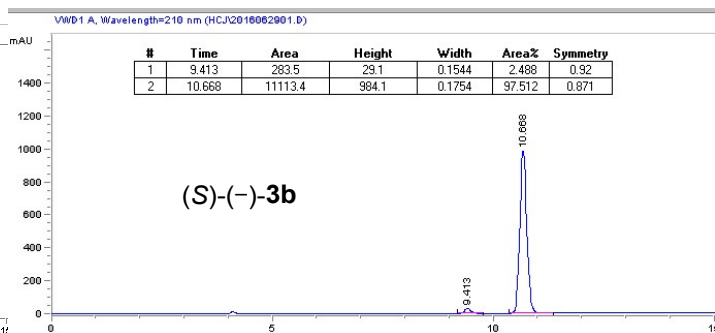

### (S)-methyl 3-(3-chlorophenyl)-3-hydroxypropanoate 3c

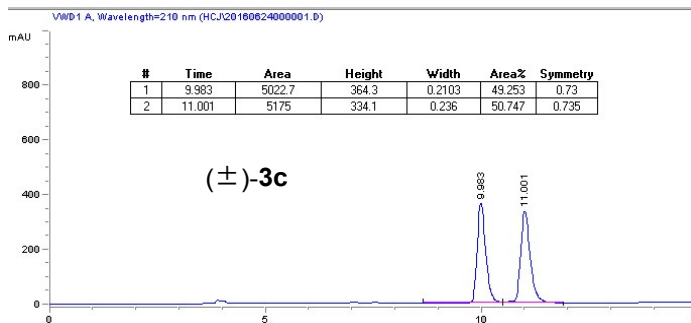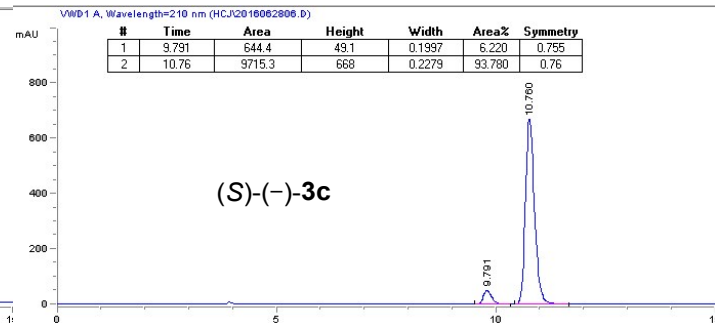

### (S)-methyl 3-(4-chlorophenyl)-3-hydroxypropanoate 3d

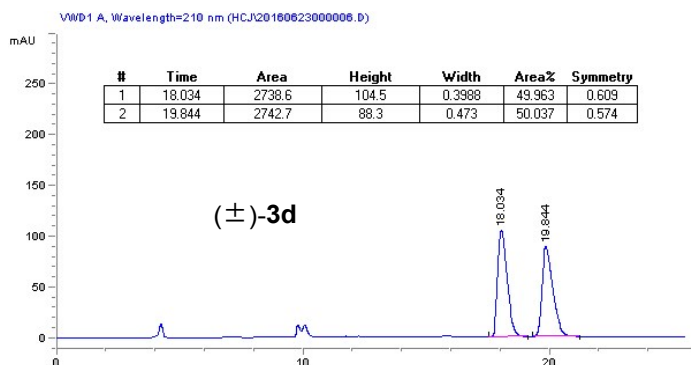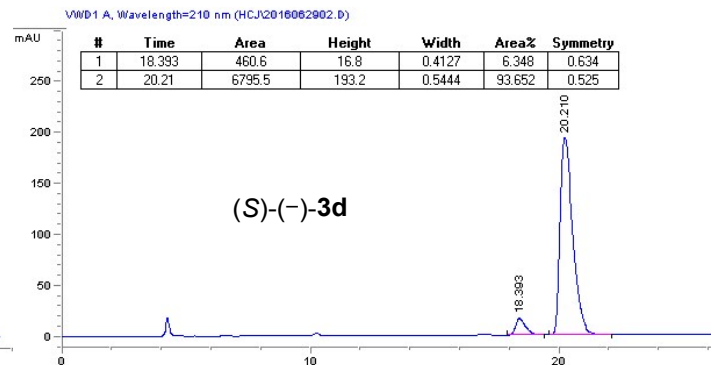

### (S)-methyl 3-(4-bromophenyl)-3-hydroxypropanoate 3e

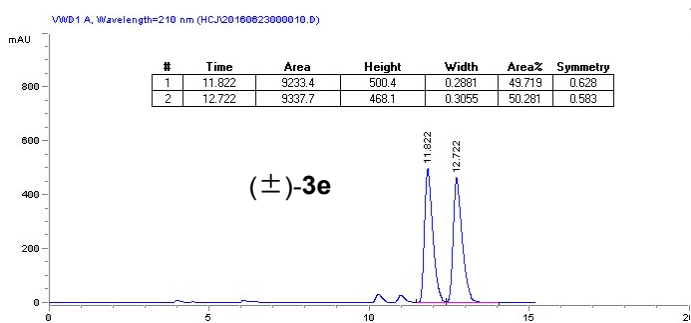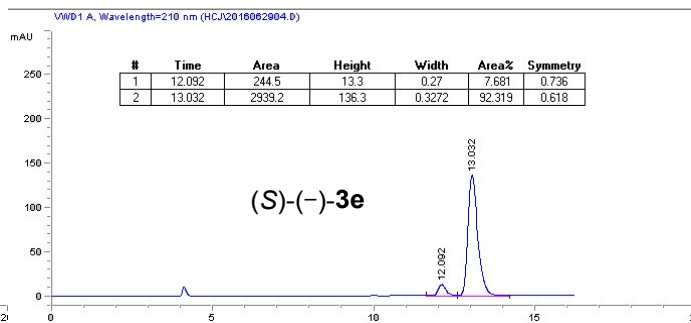

### (S)-methyl 3-(4-fluorophenyl)-3-hydroxypropanoate 3f

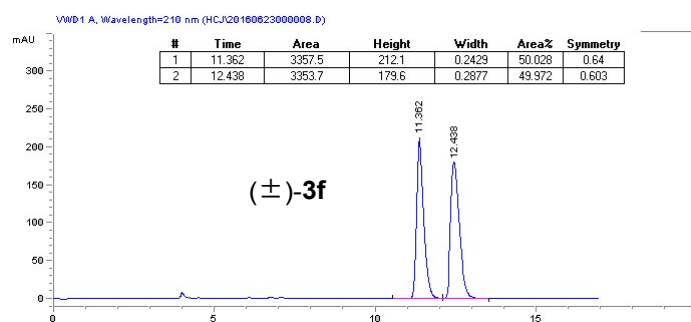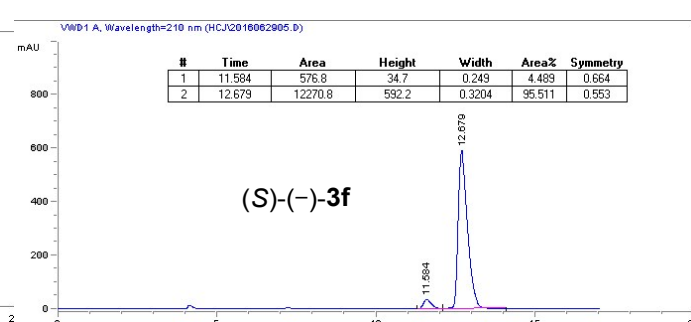

### (S)-methyl 3-hydroxy-3-(p-tolyl)propanoate 3g

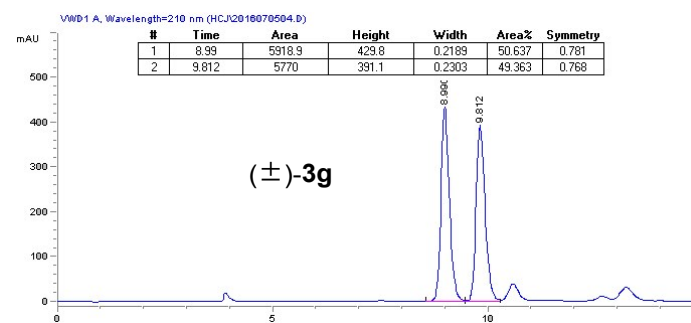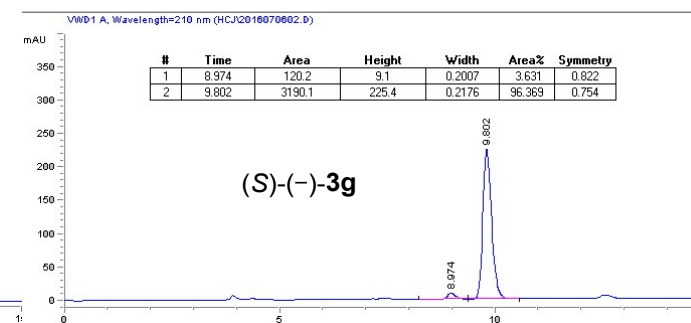

### (S)-methyl 3-(4-methoxyphenyl)-3-hydroxypropanoate 3h

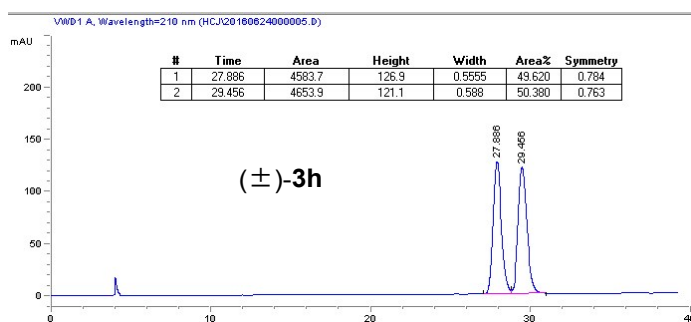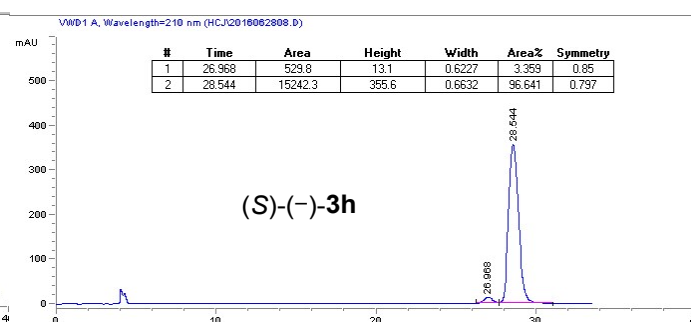

## (S)-methyl 3-hydroxy-3-(naphthalen-2-yl)propanoate 3i

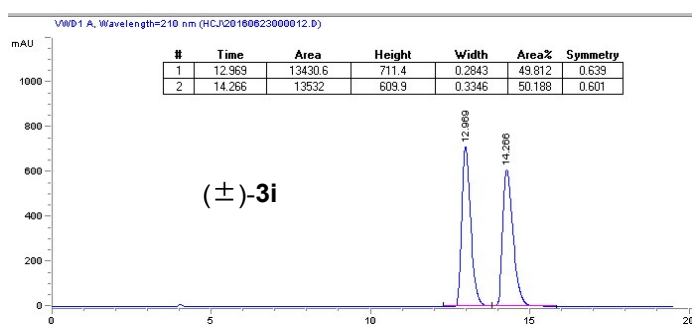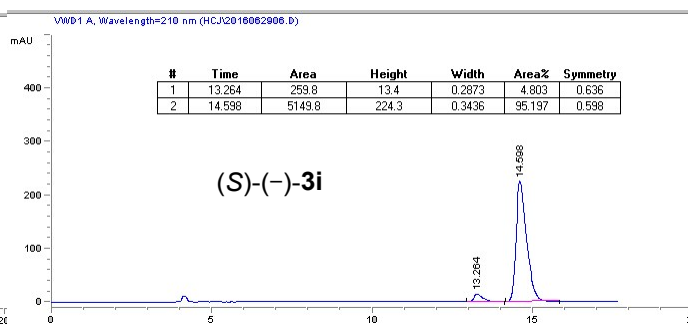

## (S)-methyl 3-(furan-2-yl)-3-hydroxypropanoate 3j

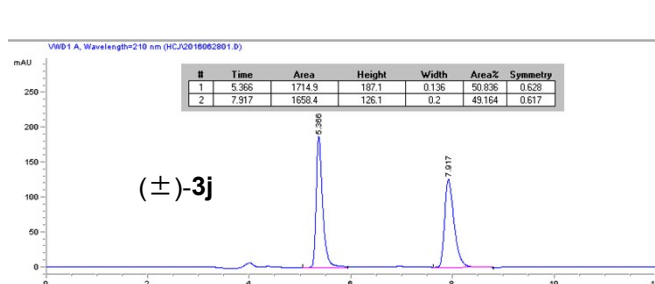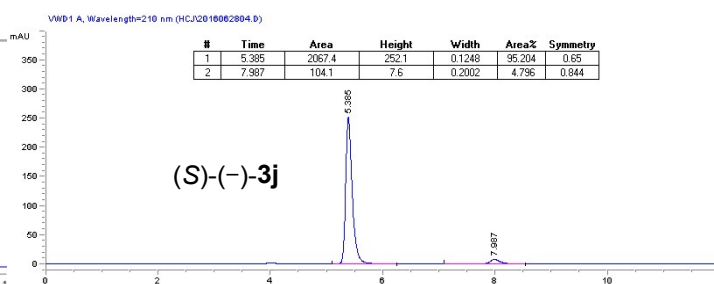

## (S)-methyl 3-hydroxy-3-(thiophen-2-yl)propanoate 3k

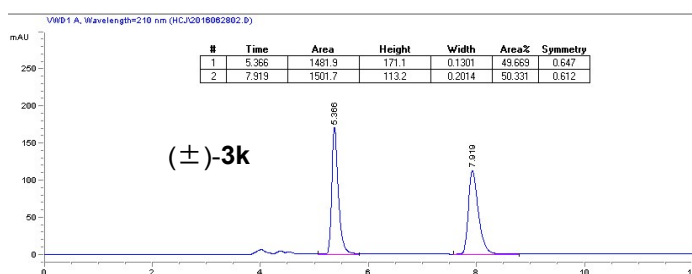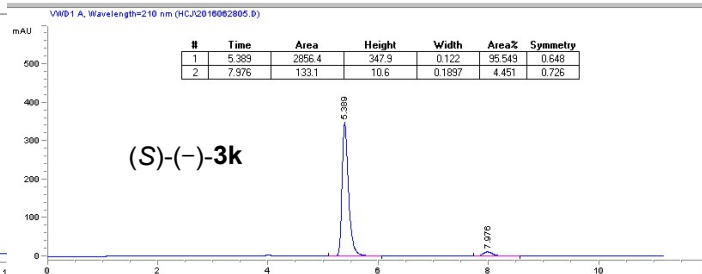

## (S)-methyl 3-hydroxy-4-methylpentanoate 3l

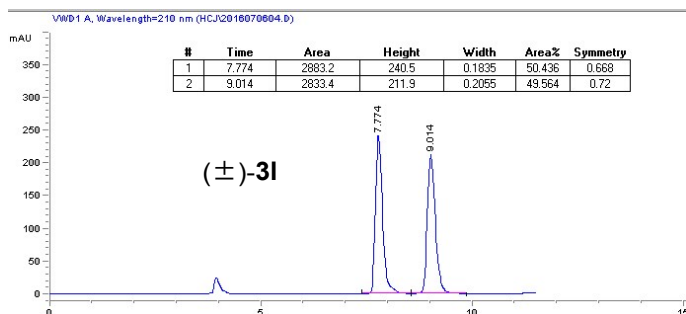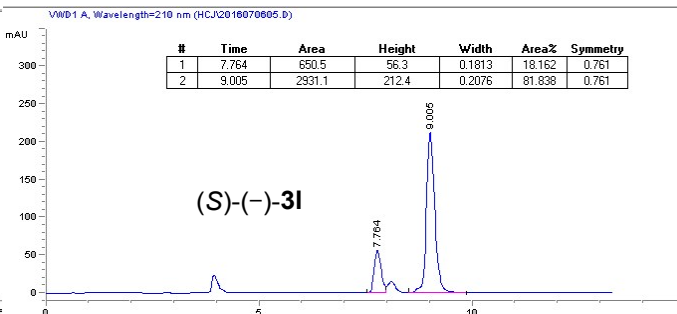

# (S)-methyl 3-hydroxybutanoate 3m

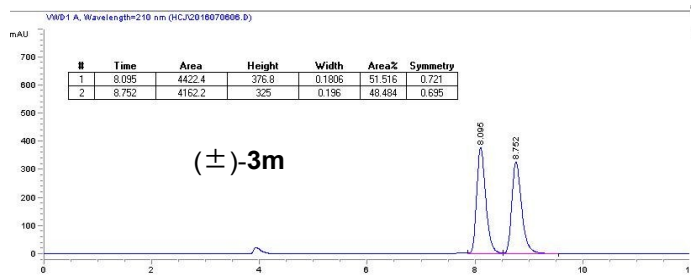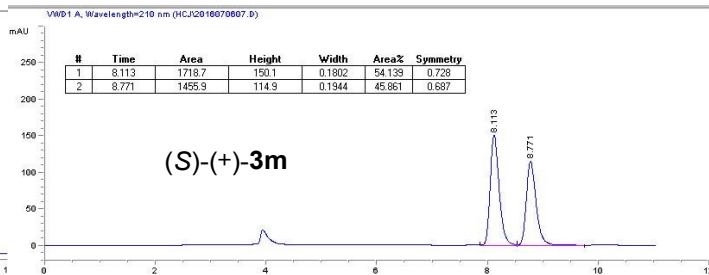

7.3873  
7.3716  
7.3549  
7.3351  
7.3087  
7.3035  
7.2956  
7.2873  
7.2574

5.1549  
5.1449  
5.1328  
5.1229

3.7242  
2.8076  
2.7855  
2.7667  
2.7445  
2.7384  
2.7283  
2.6974  
2.6874

HCJ-2387  
PROTON CDC13 {D:\NMR400\02I2} nmr 48

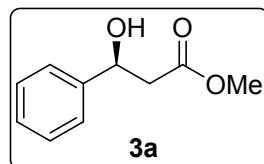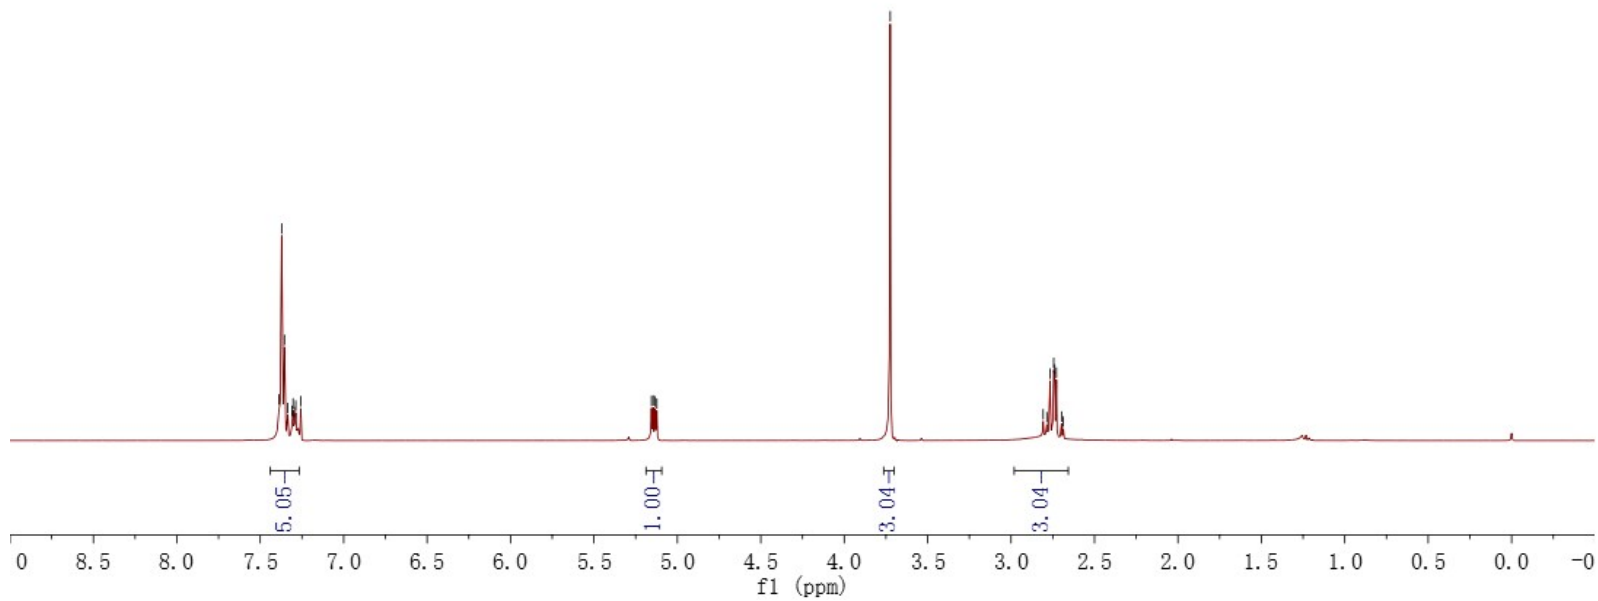

7.6409  
7.6218  
7.3425  
7.3233  
7.3110  
7.2920  
7.2622  
7.2581  
7.2435  
7.2244  
7.2054

5.5088  
5.4848

3.7484

2.8953  
2.8539  
2.6292  
2.6049  
2.5877  
2.5634

HCJ-2409  
PROTON CDCl3 {D:\NMR400\02T2} nmr 48

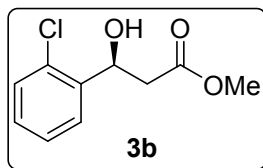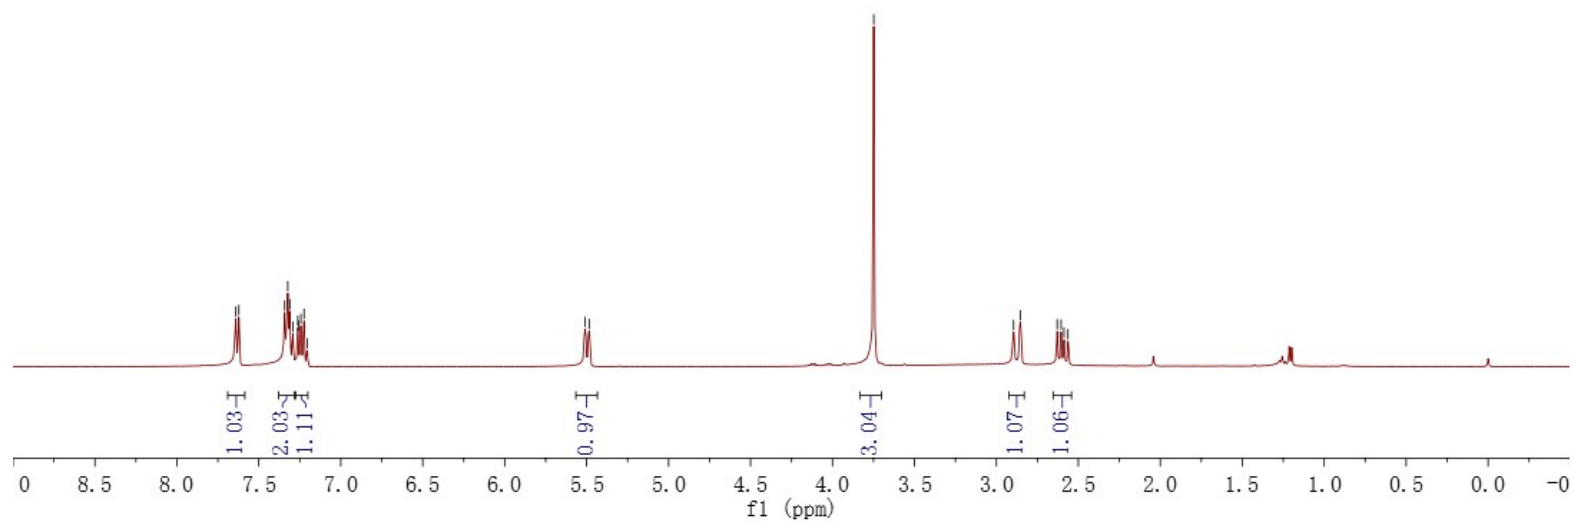

7.3930  
7.2887  
7.2707  
7.2642  
7.2618  
7.2541  
7.2501  
7.2325

5.1262  
5.1120  
5.0944

3.7341

2.7313  
2.7267  
2.7131

HCJ-2388  
PROTON CDC13 {D:\NMR400\02T2} nmr 49

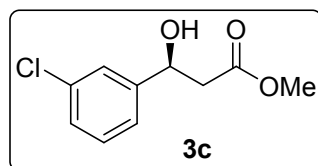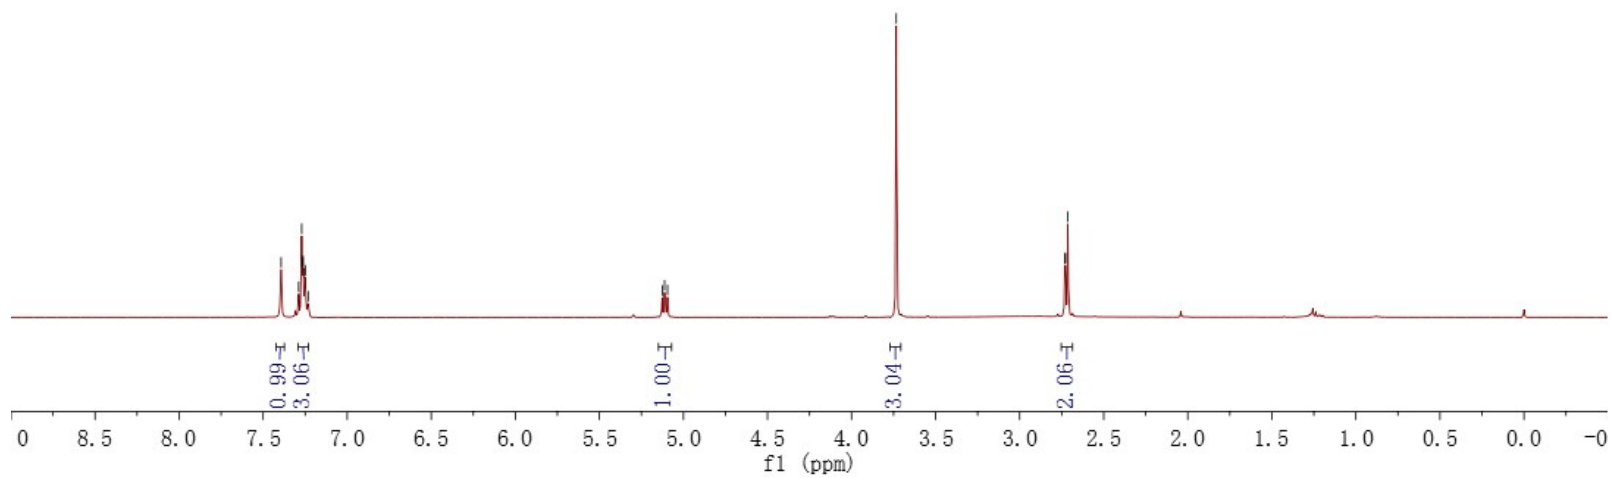



7.3435  
7.3353  
7.3206  
7.2966

5.1276  
5.1158  
5.1074  
5.0957

3.7266

2.7250  
2.7120  
2.7044  
2.7009

HCJ-2411  
PROTON CDC13 {D:\NMR400\02I2} nmr 49

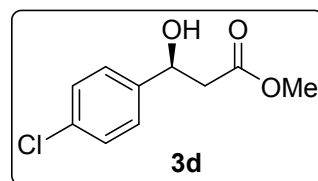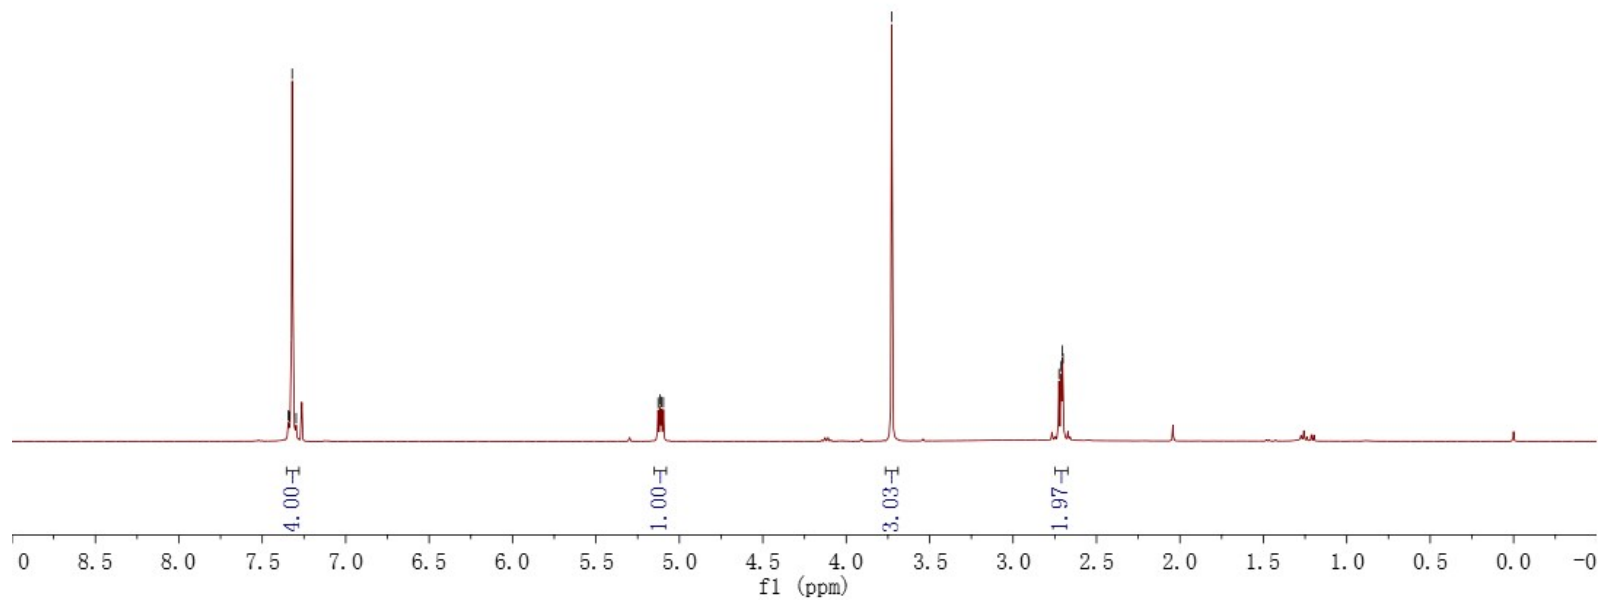

HCJ-2391  
PROTON CDC13 {D:\NMR400\02T2} nmr 52

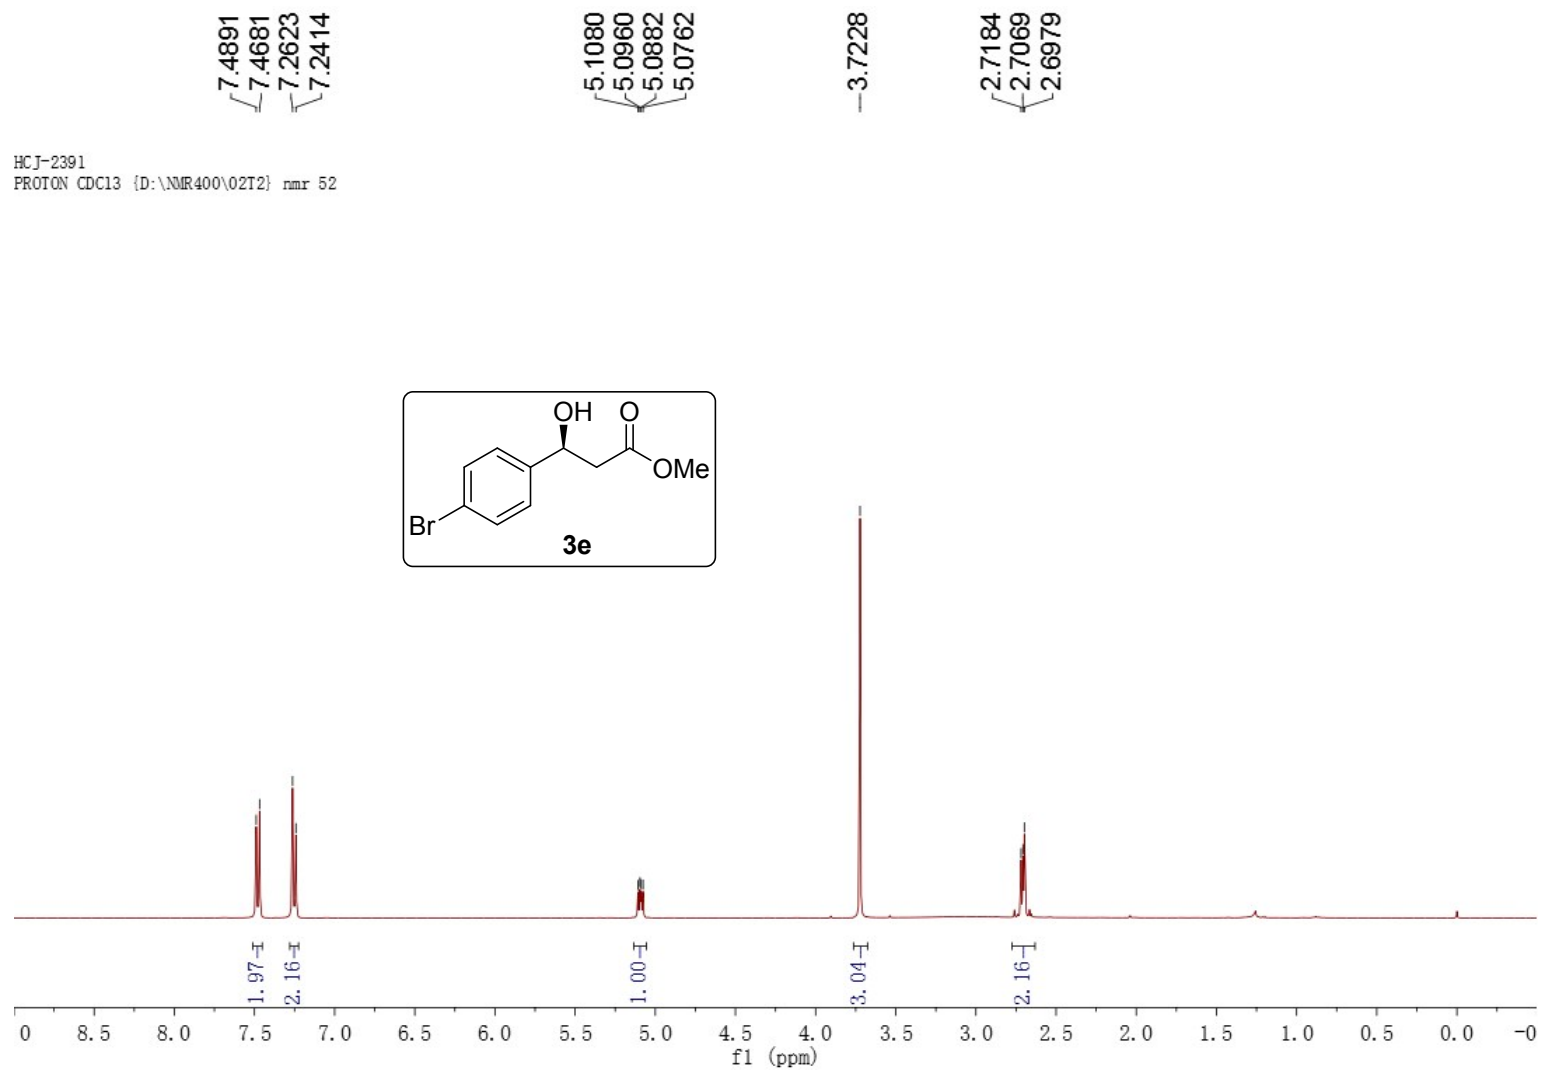

7.3659  
7.3523  
7.3444  
7.3309  
7.2617  
7.0615  
7.0399  
7.0183

5.1360  
5.1256  
5.1143  
5.1040

—3.7269

2.7797  
2.7579  
2.7386  
2.7159  
2.7035  
2.6727  
2.6624

HCJ-2390  
PROTON CDCl3 {D:\NMR400\02T2} nmr 51

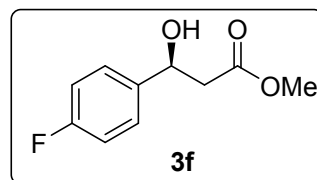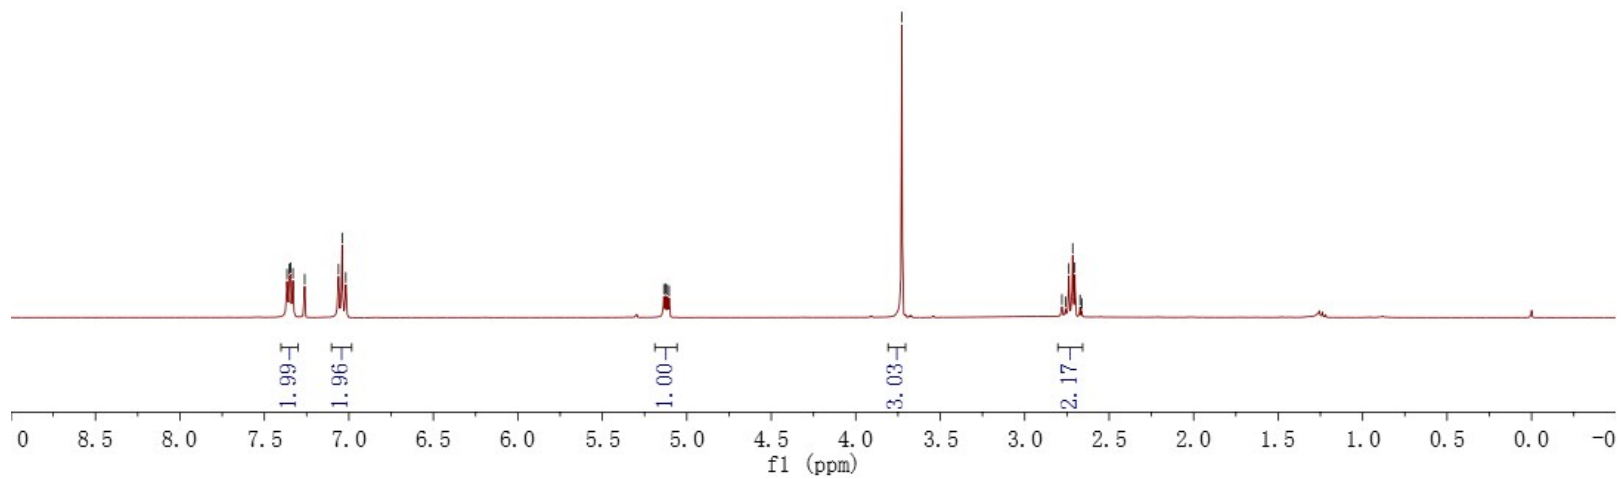

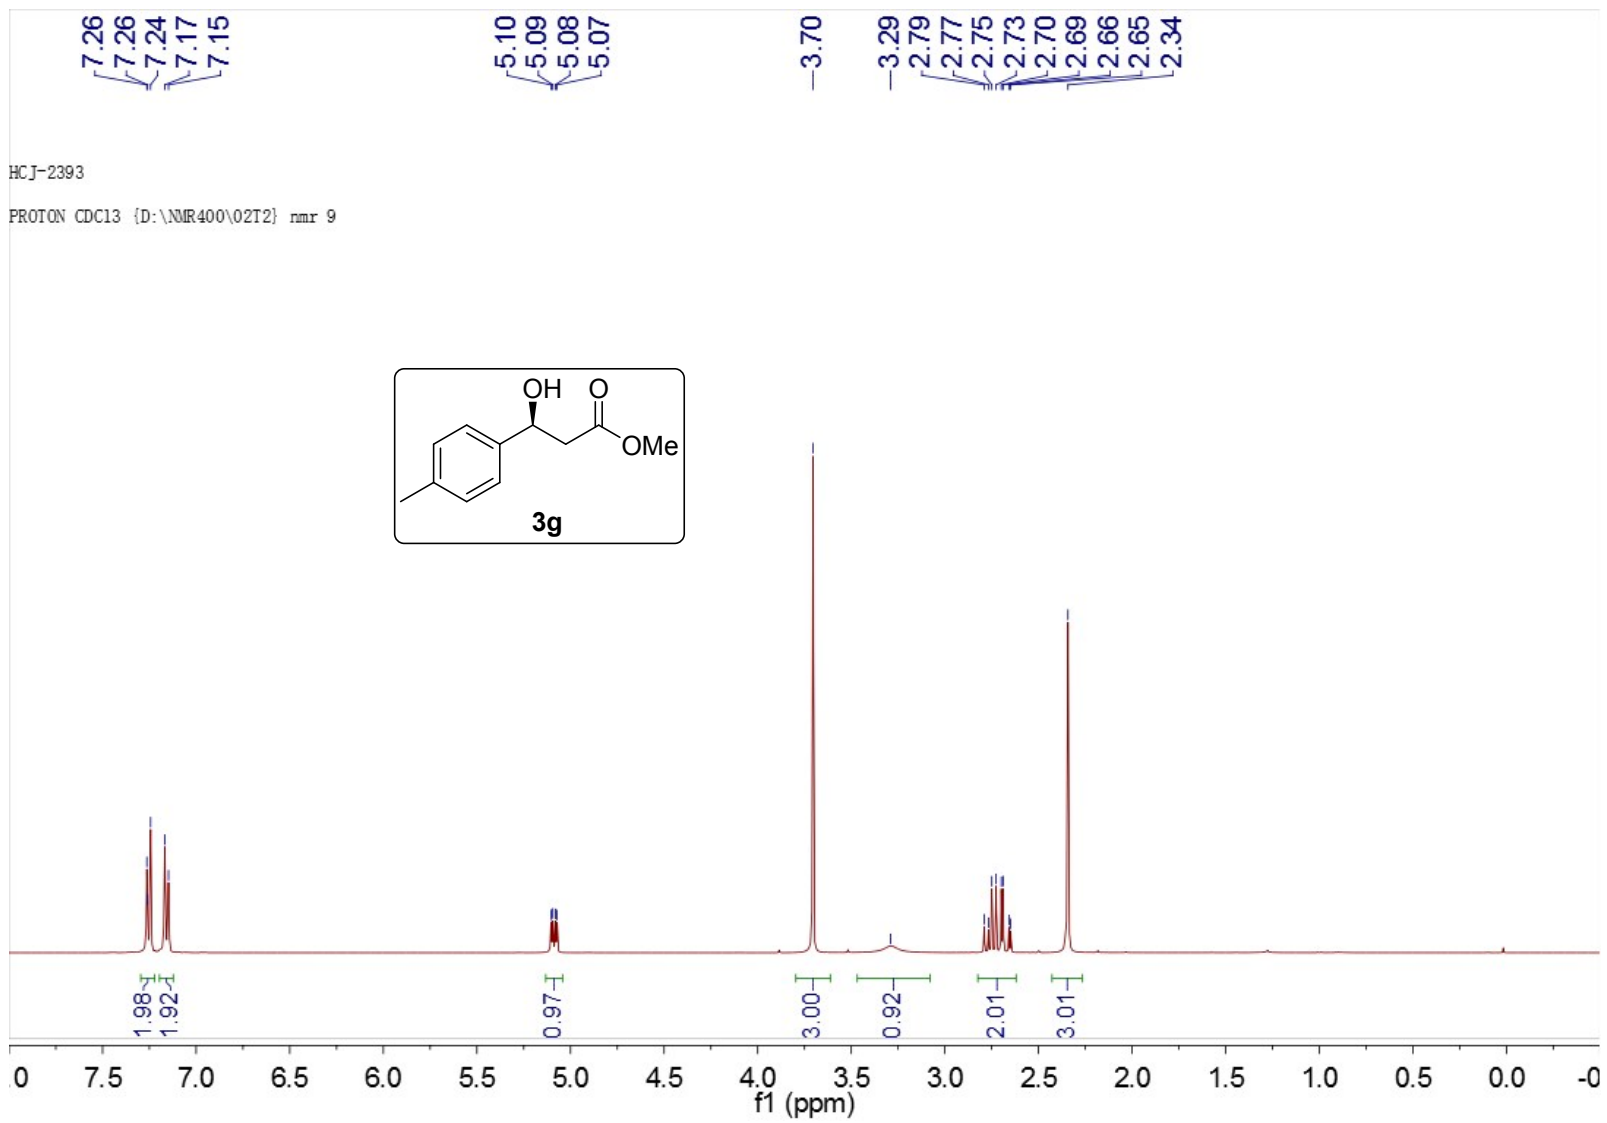

7.3076  
7.2861  
6.8964  
6.8750

5.1075  
5.0983  
5.0846  
5.0755

3.8007  
3.7191  
3.1040  
2.8038  
2.7809  
2.7632  
2.7402  
2.7087  
2.6995  
2.6681  
2.6588

HCJ-2392  
PROTON CDCl3 {D:\NMR400\02T2} nmr 53

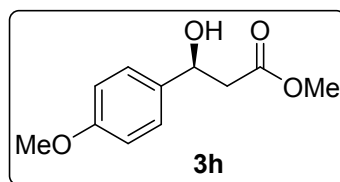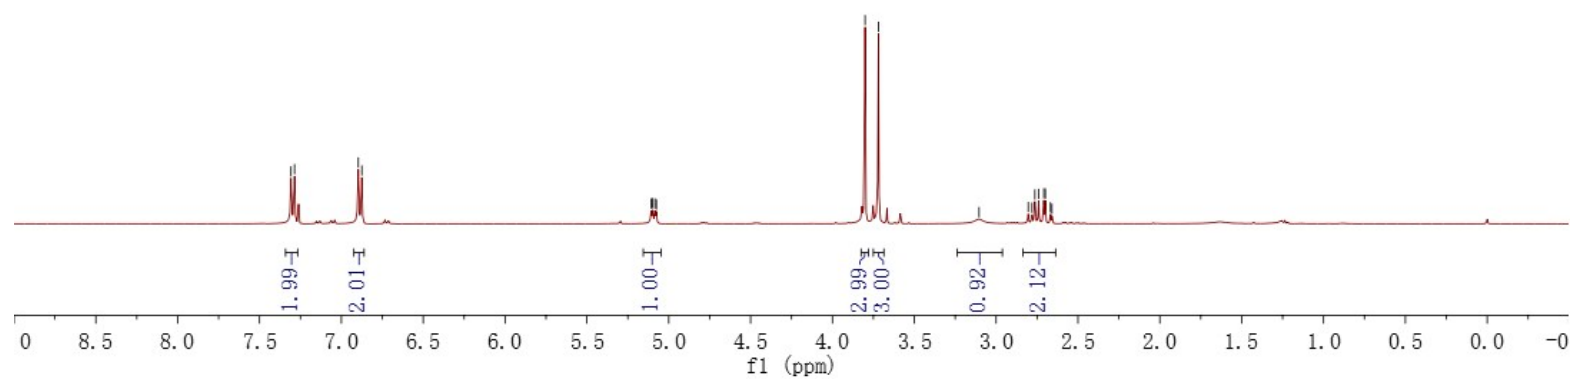

7.8346  
7.8199  
7.4807  
7.4718  
7.4608

5.3161  
5.3056  
5.2946  
5.2843

3.7246  
3.0497  
2.8823  
2.8608  
2.8415  
2.8196  
2.8086  
2.7781  
2.7676

HCJ-2416  
PROTON CDC13 {D:\NMR400\02T2} nmr 50

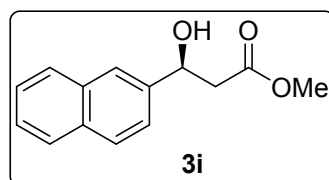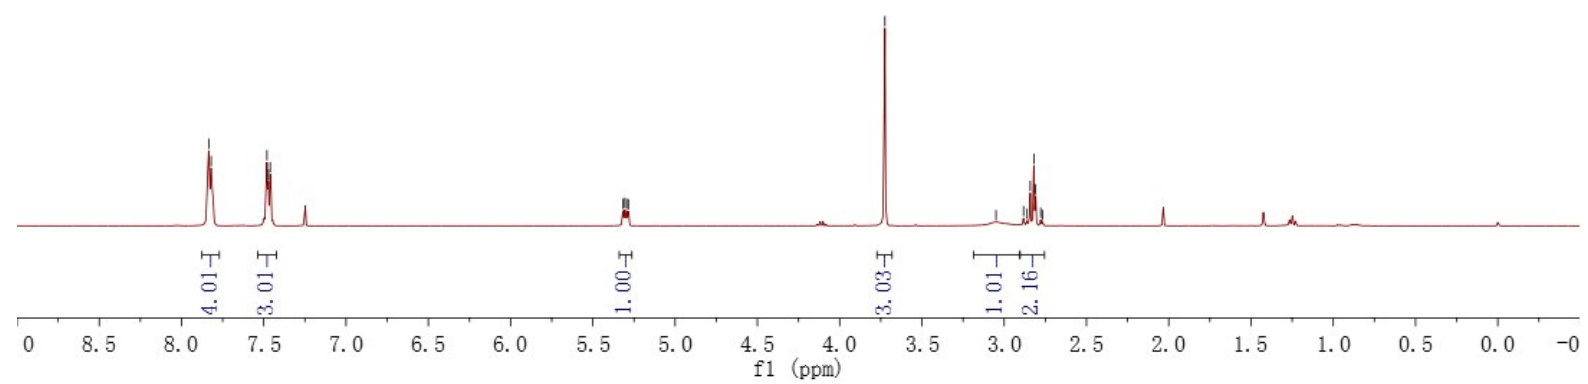

7.2631  
7.2532  
6.9787  
6.9664  
6.9574

5.3978  
5.3864  
5.3778  
5.3665

3.7350  
2.9327  
2.9126  
2.8915  
2.8725  
2.8639  
2.8340

HCJ-2417  
PROTON CDCl3 {D:\NMR400\02T2} nmr 51

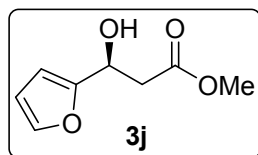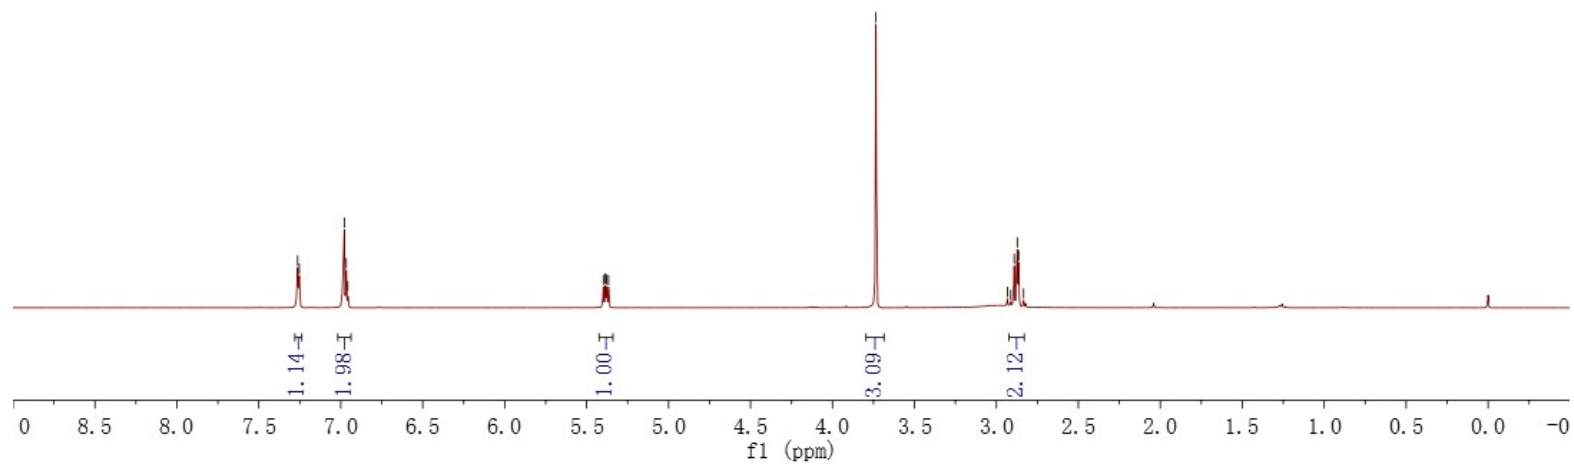

7.2691  
7.2654  
7.2613  
7.2573  
7.2538  
6.9803  
6.9679  
6.9590

5.4004  
5.3889  
5.3804  
5.3690

3.7372

2.8934  
2.8774  
2.8736  
2.8664

HCJ-2418  
PROTON CDCl3 {D:\NMR400\02T2} nmr 52

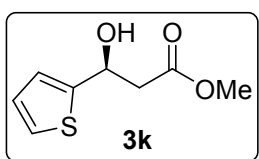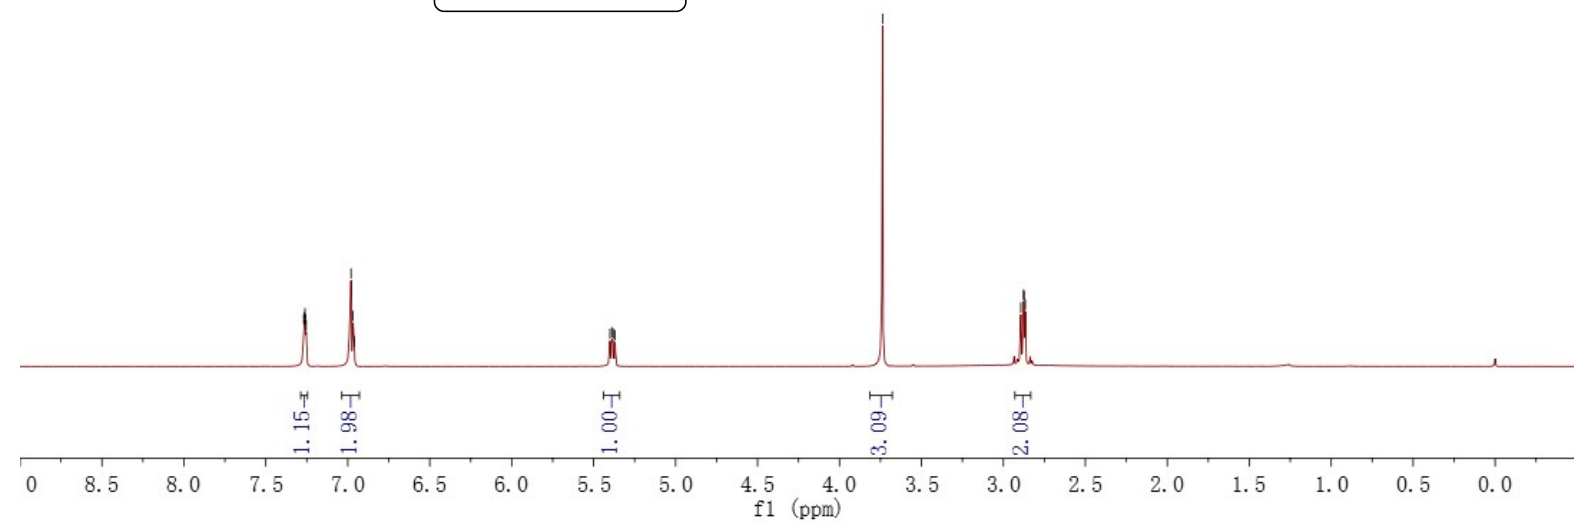



HCJ-2396  
PROTON CDCl3 {D:\NMR400\02T2} nmr 57

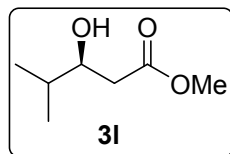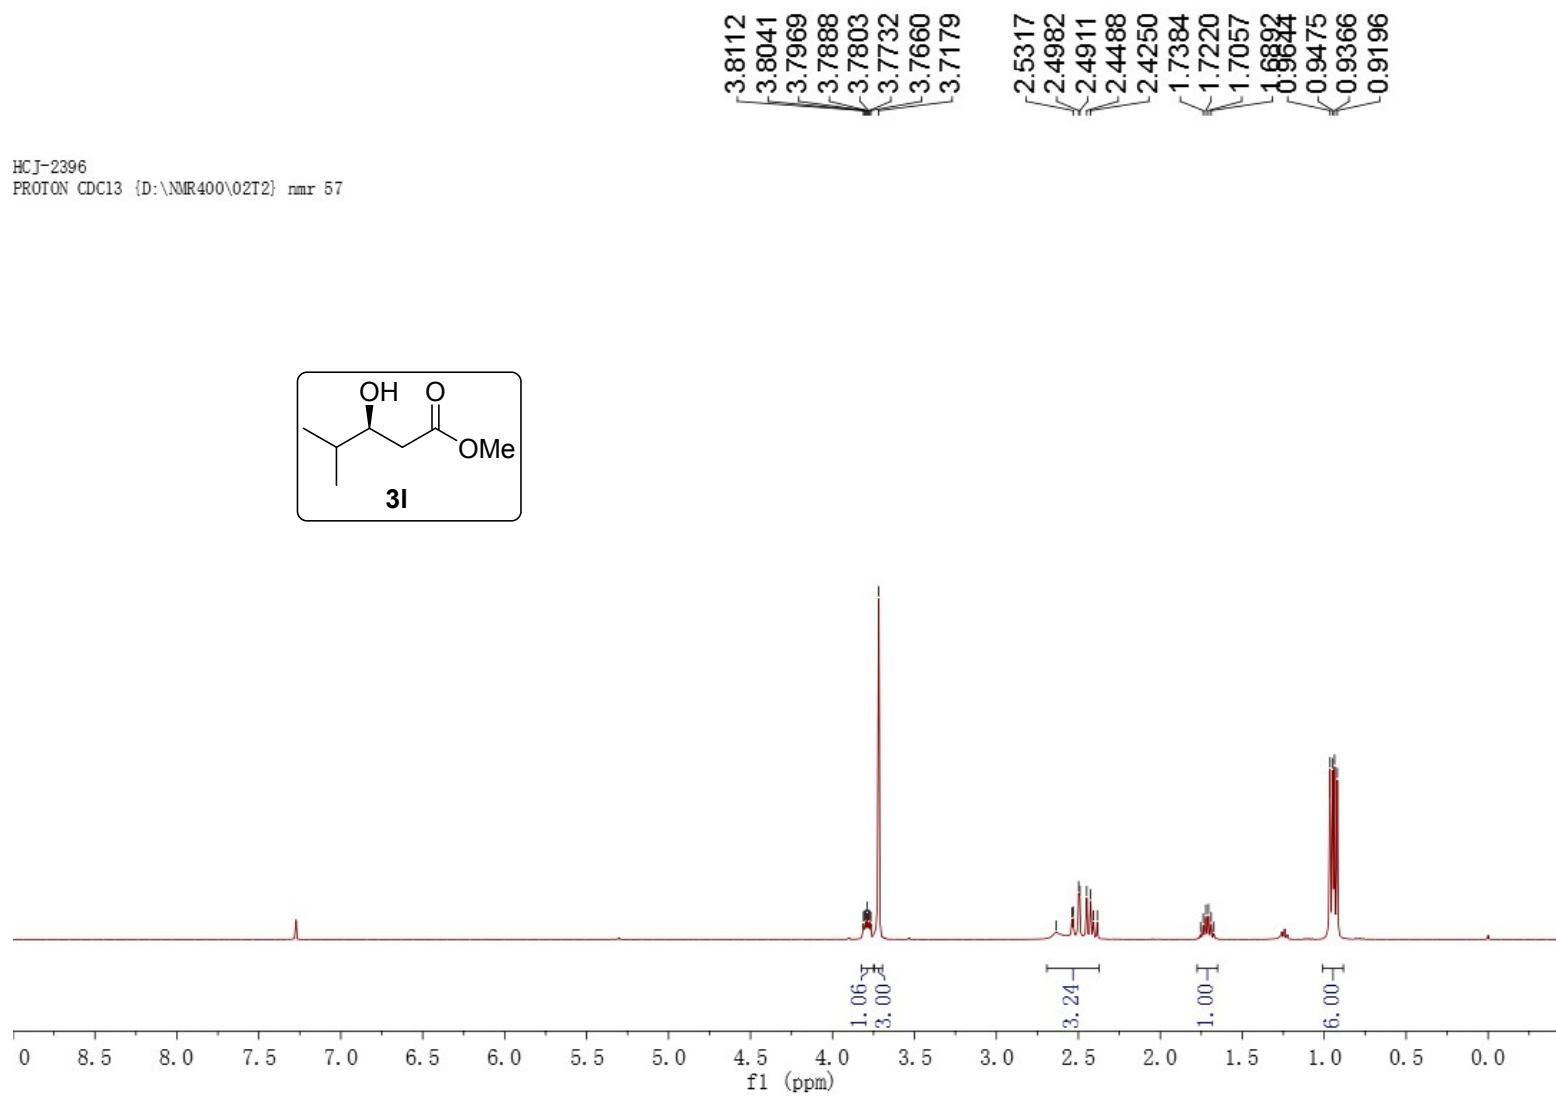

HCJ-20170216

PROTON CDC13 {D:\NMR400\02T2} nmr 35

4.23  
4.22  
4.22  
4.21  
4.21  
4.20  
4.20  
4.19  
4.19  
4.18  
4.18  
4.17  
-3.72  
-2.87  
-2.53  
-2.52  
-2.49  
-2.48  
-2.47  
-2.45  
-2.43  
2.40  
1.24  
1.23

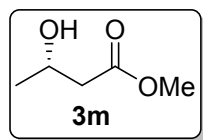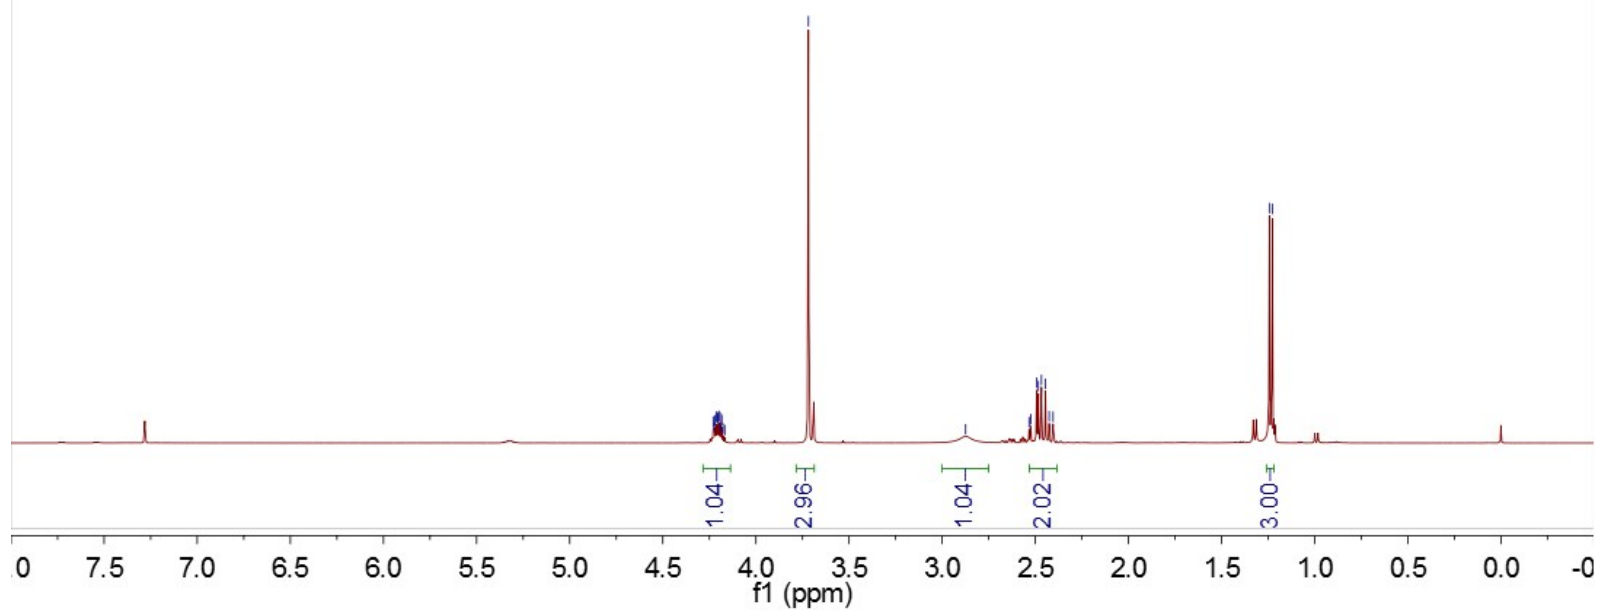

Supplement: c7ra00472a1.pdf [file c7ra00472a1.pdf]
